# Supplementary material
Source: PubMed Central journal article supplement (PMC6590911)
Supplement: NIHMS991102-supplement-Supp_figS1-6.pdf [file NIHMS991102-supplement-Supp_figS1-6.pdf]

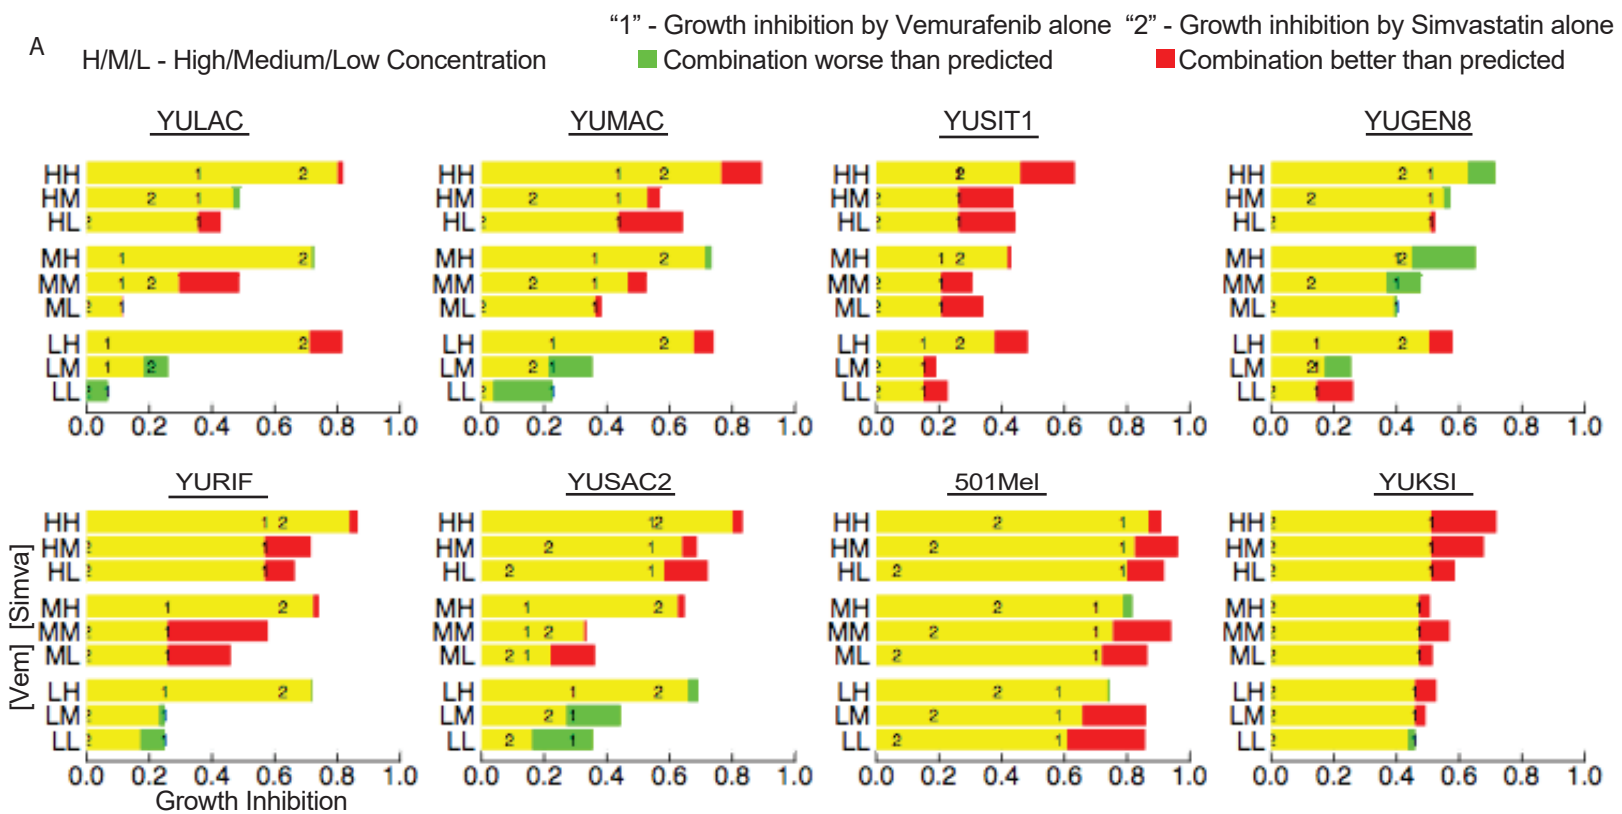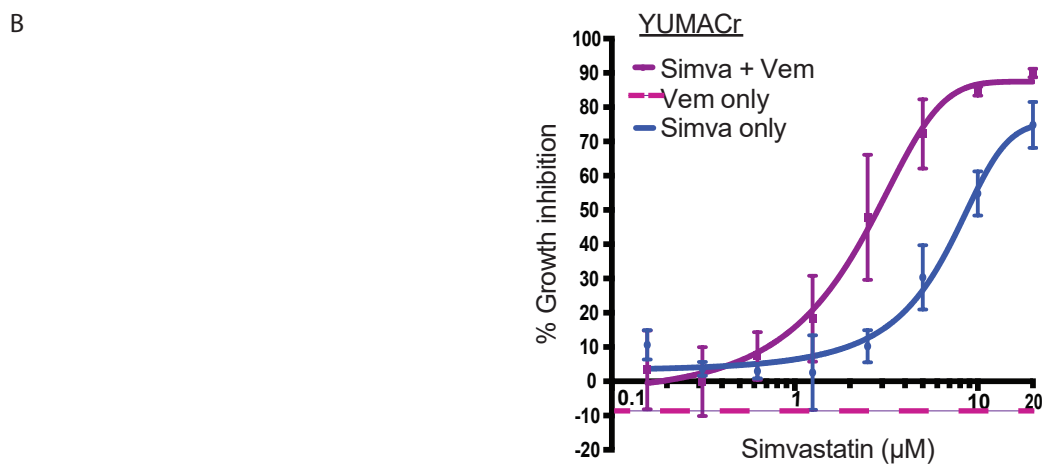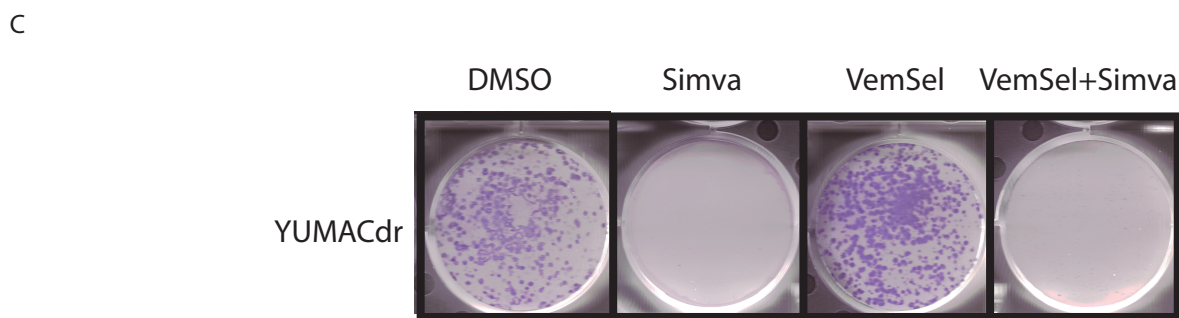

A

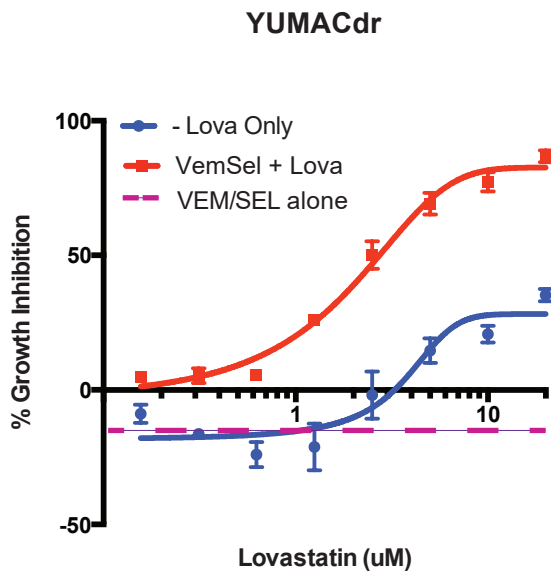

B

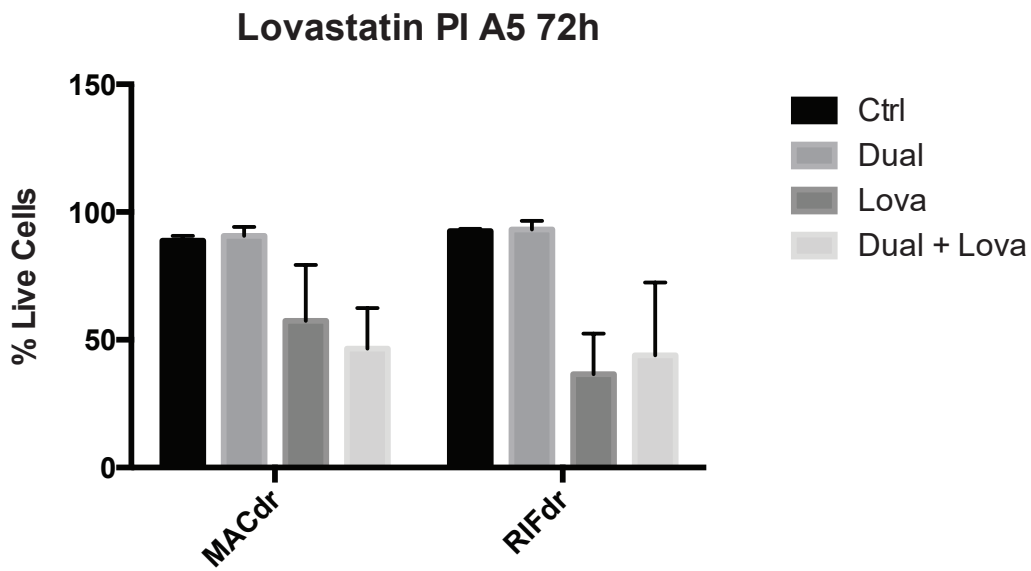

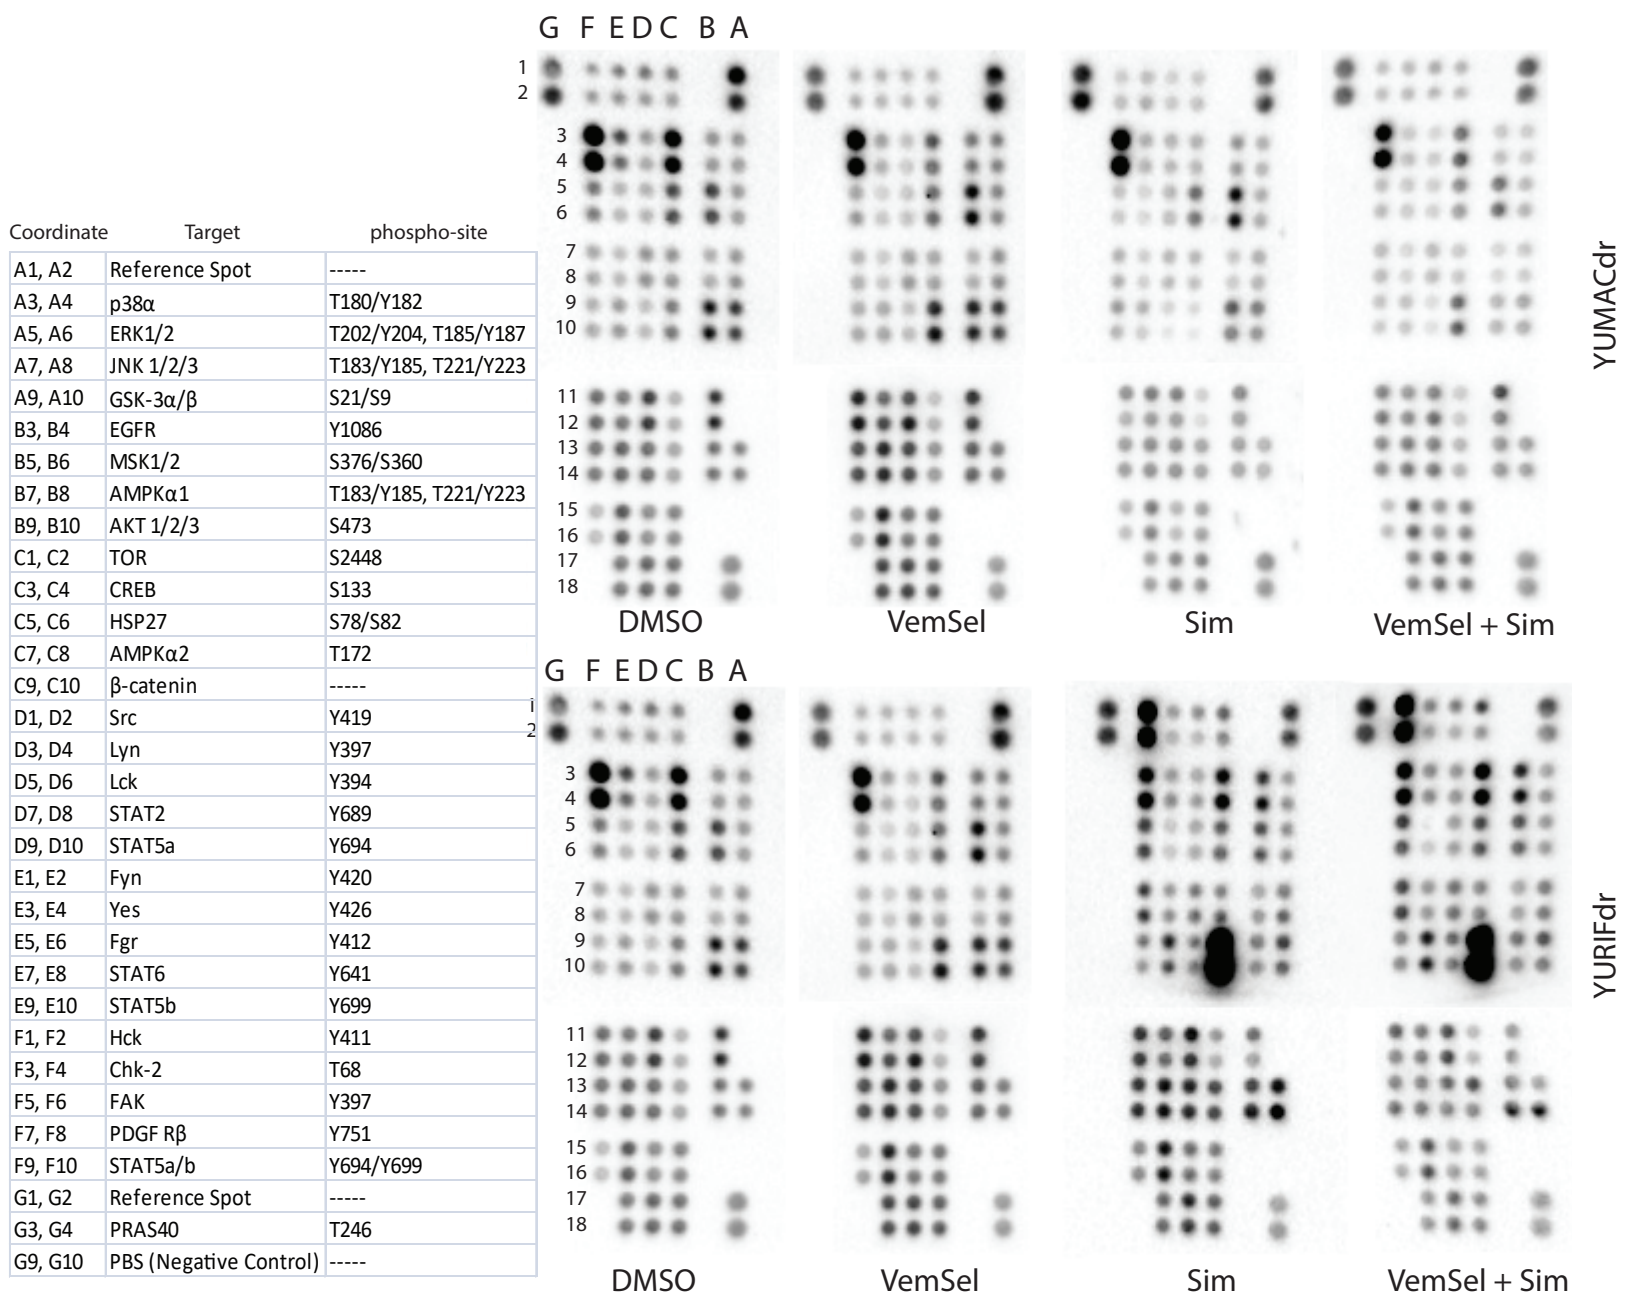

VemSel

VemSel + Simvastatin

DAPI

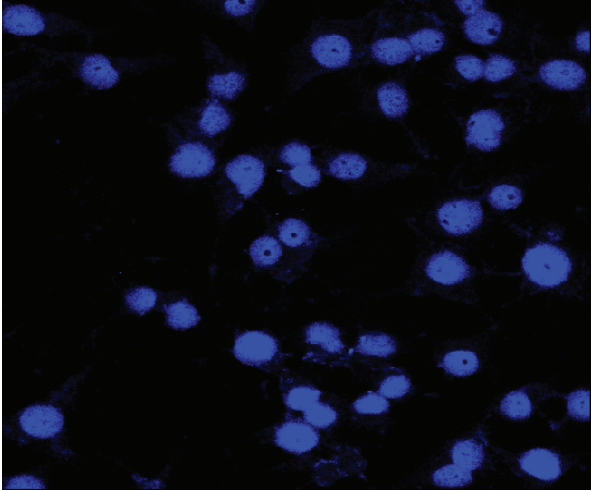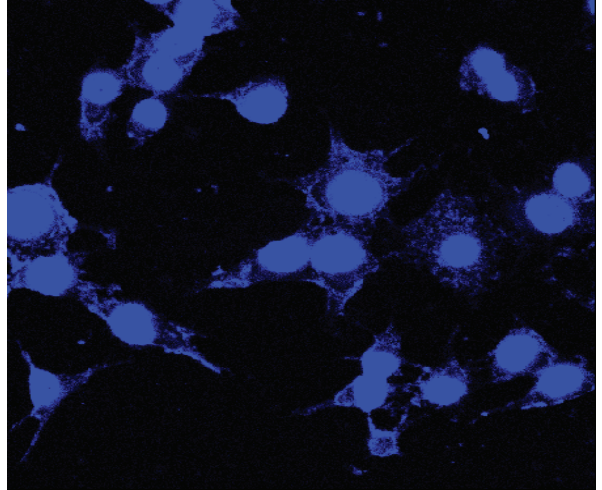

YAP

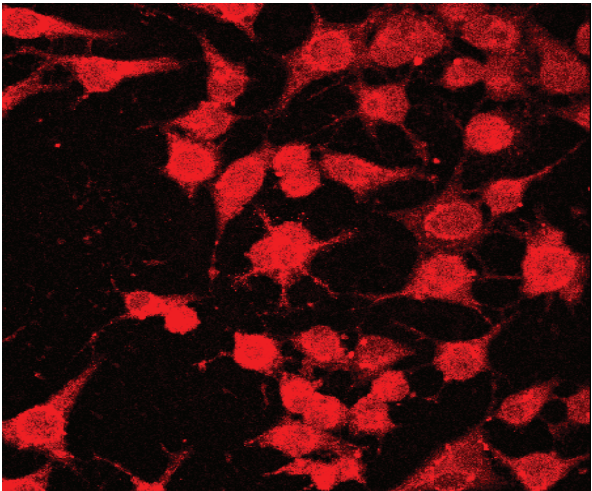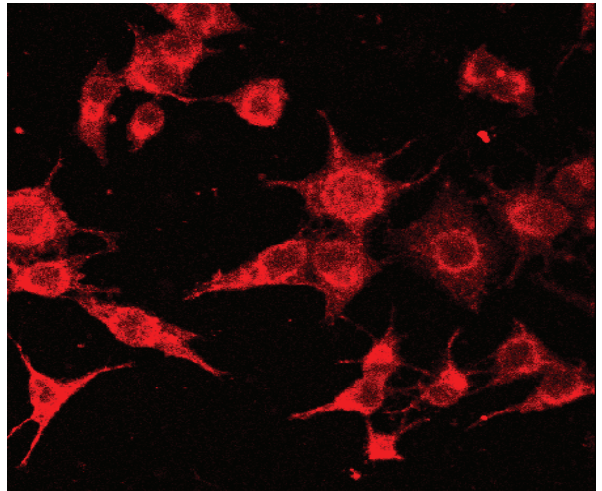

Merge

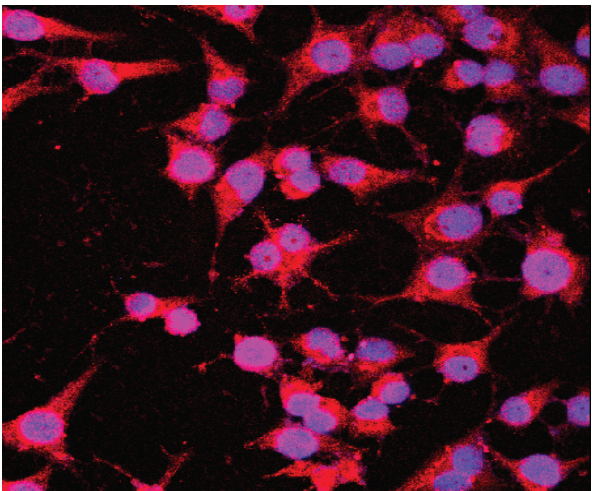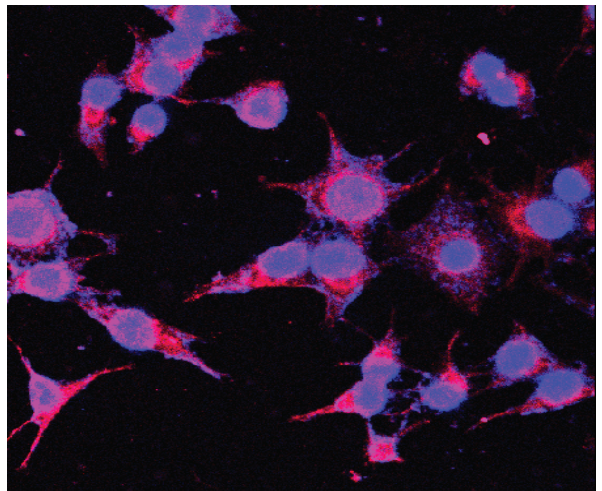

YUMACdr

VemSel

VemSel + Simvastatin

DAPI

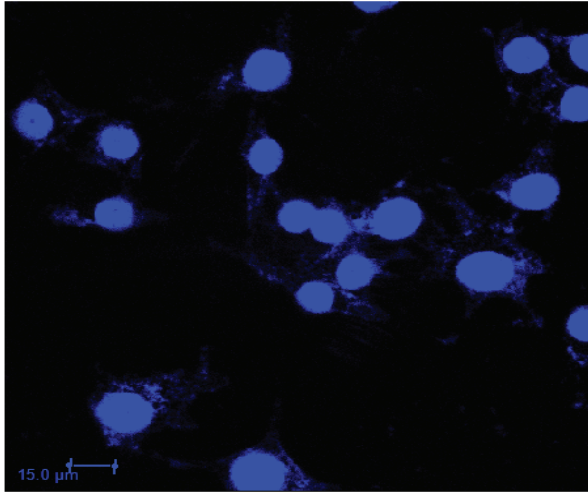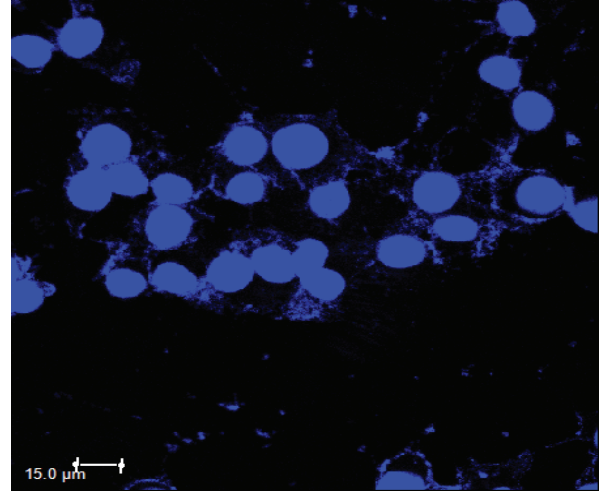

NRAS

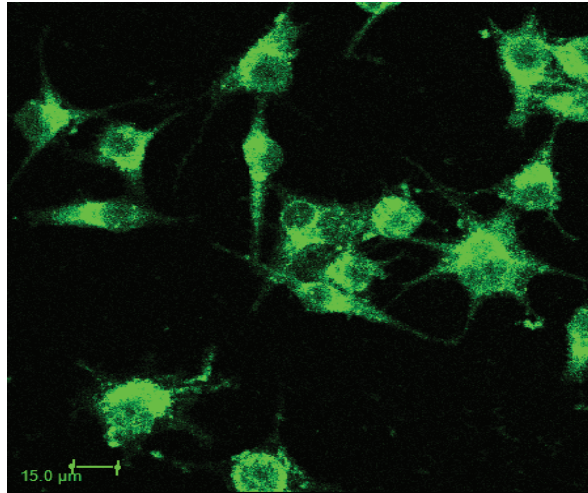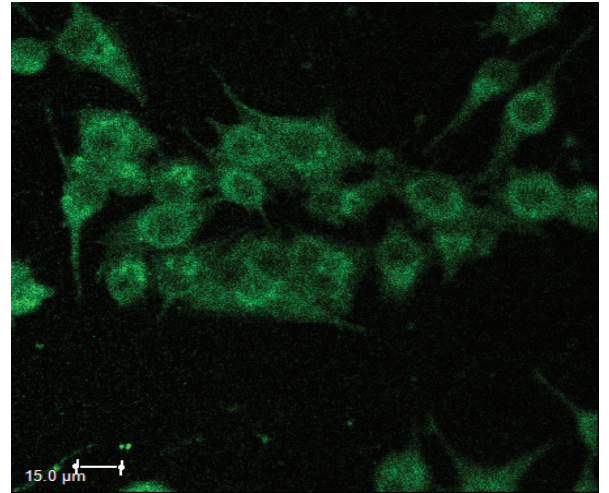

Merge

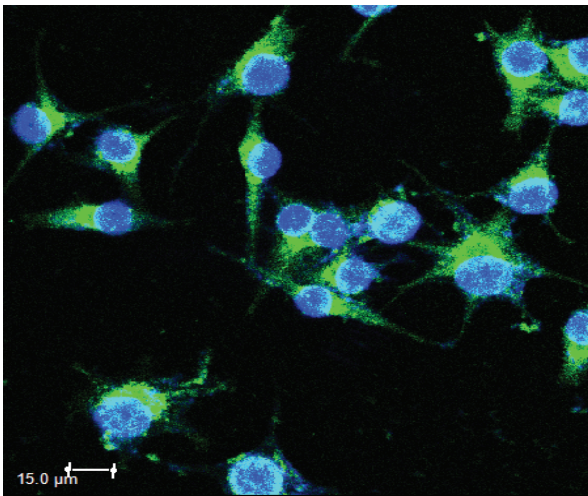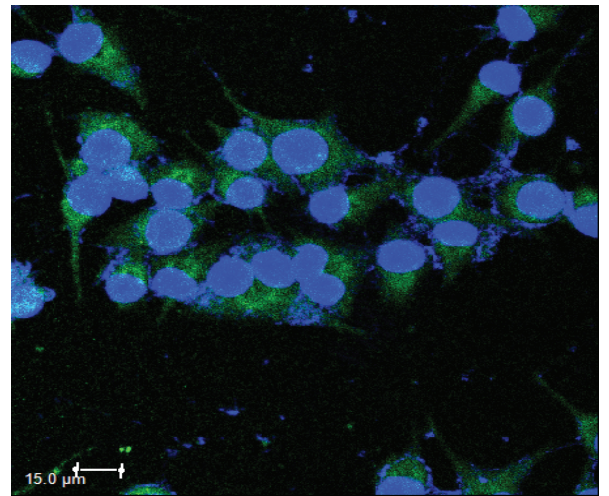

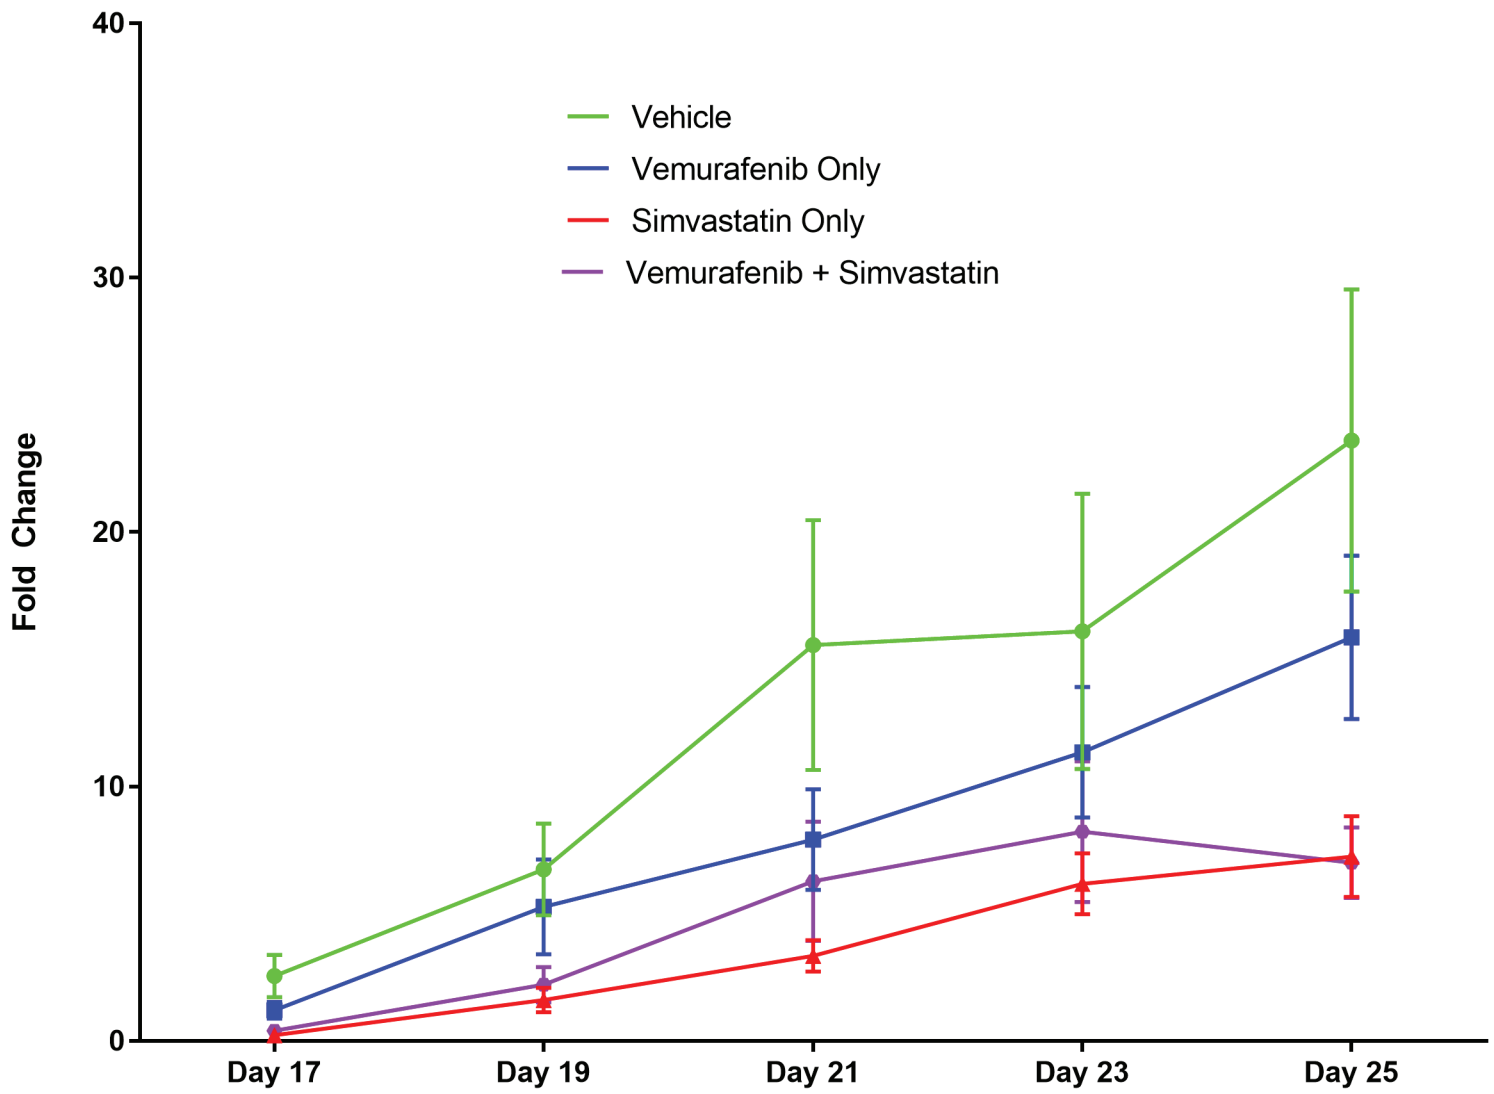

**Supplementary Figure 1: High-throughput drug screening identifies statins as showing significant synergy with MAPK inhibitors.** (A). In a panel of 8 *BRAF*-mutant melanomas screened in a 72 hour assay, we observed synergistic growth inhibition in at least 3 vemurafenib/simvastatin drug conditions in 100% of lines. (B). Simvastatin was found to be greatly potentiated in combination with vemurafenib in lines with acquired resistance to vemurafenib. Assays were performed in triplicate. Error bars represent SEM, n=3. (C). 5 $\mu$ mol/L simvastatin significantly reduced colony formation as both mono- and combination therapy over 14 day assay. n=3.

**Supplementary Figure 2: Lovastatin recapitulates growth inhibitor activity of simvastatin.** (A,B). Treatment with 5 $\mu$ mol/L lovastatin showed significant growth inhibition and apoptosis induction in 72 hour dose-response assay and 72 hour propodium iodide/annexin V flow cytometry. Error bars represent SEM, n=3.

**Supplementary Figure 3: Major effects of statins are restricted to a limited number of pathways.** Human phospho-kinase antibody array profiling of lysates from resistant lines YUMACdr and YURIFdr treated with or without 5  $\mu$ mol/L vemurafenib plus 150nmol/L selumetinib and with or without 5 $\mu$ mol/L simvastatin for 24 hours showing significant downregulation of AKT activation.

**Supplementary Figure 4: Treatment with statins delocalizes the transcription factor YAP away from the nucleus.** Treatment of resistant YUMACdr cells with 5  $\mu$ mol/L vemurafenib plus 150nmol/L selumetinib with or without 5 $\mu$ mol/L simvastatin shows significant delocalization of the transcription factor YAP away from the nucleus with HMG-CoA reductase blockade.

**Supplementary Figure 5: Treatment with statins delocalizes NRAS away from its site of greatest activity at the plasma membrane.** Treatment of resistant YUMACdr cells with 5  $\mu$ mol/L vemurafenib plus 150nmol/L selumetinib with or without 5 $\mu$ mol/L simvastatin shows significant relocation of NRAS from the plasma membrane to the cytoplasm, as well as overall downregulation with statin treatment.

**Supplementary Figure 6: Mevalonate pathway activity plays a significant role in melanoma activity *in vivo*** (A). Four cohorts of five mice each were grafted with YUMACr vemurafenib-resistant human melanoma cells. Treatment was begun once the first mice showed tumors of at least 1mm<sup>3</sup>. Mice receiving vemurafenib were fed vemurafenib-containing chow, while mice receiving simvastatin received 30mg/kg simvastatin injection in DMSO every other day after an initial loading phase of 4 daily doses. The experiment was concluded when the first mouse reached tumor size endpoint of 1cm<sup>3</sup>. Tumor volumes were measured every 2 days after treatment began.
